# Supplementary material for: Exploring the molecular mechanisms and shared gene signatures between rheumatoid arthritis and diffuse large B cell lymphoma
Source: Front Immunol. 2022 Oct 31;13:1036239. doi: 10.3389/fimmu.2022.1036239 (PMC9659608; doi:10.3389/fimmu.2022.1036239)
Supplement: Supplementary file 1 [file DataSheet_1.xlsx]

## Sheet: Sheet1
DPY30
CLK4
AHDC1
UQCR11
TLN1
ZEB1
G2E3
MIER1
COX6C
MRPL1
BLOC1S2
ACTR10
SNX16
AP1S2
DNAJC15
NCOR2
EVI2A
UFM1
FPGT
HS2ST1
COPS4
SEC14L1
IMMP1L
GSTM4
PPP2R5A
THAP1
ANKRD49
SEC11C
ASNSD1
DRAM2
DCUN1D5
GMFB
LACTB2
KLHL9
MITD1
TIPIN
BRD4
GTSF1
MRPS28
RDX
VRK2
YPEL5
CREBBP
ND6
RBM7
RPS29
COX7B
ZNF468
EXOSC3
UQCRQ
ERH
SOCS4
BIRC2
CGRRF1
RPS24
PYROXD1
SLC35A1
RGS18
ANAPC10
FBXO30
ATP2A3
COMMD8
ECT2
FMNL1
KIAA1109
ZDHHC17
SLC25A40
COX16
ATP11B
ZFAND1
YAF2
DPM1
EID1
SF3A1
MED7
SOD1
TMX3
ABHD13
CLSTN3
ZDHHC20
MINPP1
TNFSF8
GOLGA2
ESCO1
ABCA11P
NDUFA1
PCMTD1
PSMD10
RNPEP
SUZ12
MED21
RPL9
RAB11FIP1
LRRC8B
POLR2A
HAT1
DNTTIP2
P4HA1
RAP2A
VPS54
SLC39A8
CBX3
PPP4R2
RPS27L
KIAA1586
TBC1D15
IMPA1
RPL11
RAP2C
SOCS5
CHURC1
BLZF1
MRPL42
MRPL51
NDUFB2
IGF2R
EIF3E
SKIL
RAB28
ORC4
NXT2
COMMD6
MTX2
GSTM2
TTC33
ERGIC2
TBC1D23
DYNLT3
NME1
RCN2
LYPLAL1
ZNF22
KLRB1
ZBED5
B3GNT2
MYADM
MLXIP
VAMP8
LILRA4
ANXA1
POLI
ECHDC1
NDUFA6
TRIM23
EXOC5
RAB8B
TAF7
PSMA3
STAG2
CRLS1
ZNF277
COG6
RSL24D1
MDH1
DPH3
CAPZA2
LGALS1
REEP3
MGST3
MRPL47
TWF1
CCT2
ALG14
TCEAL8
HAUS6
PRDX1
WDR5B
BBS10
MYL6
MASTL
C12orf29
TIGD1
MTHFD2
SS18L2
VBP1
MORC3
TMTC3
RPAP3
PLEKHA3
COPS2
ZBTB16
UQCRB
EXOC8
RWDD3
GPN3
DNAJA1
UBA3
NDUFA4
RAD51C
SIPA1L1
OXR1
CHCHD1
RBX1
TSNAX
LTN1
LIG4
MRPL50
SLC35B3
PFDN5
PNPLA8
ELMOD2
NIPAL2
PUS7L
RNF138
KCTD9
ZBTB6
PDCD10
GABPA
CASP3
HSP90AA1
PSMA4
PHF5A
TAX1BP1
NIPSNAP3A
HSPA13
PEX2
CAPZA1
CHM
MAPK6
PHF6
JKAMP
TAF13
GZMA
POLR2K
TPP1
RPS15A
ZNF302
TDG
ZNF226
CCDC82
BAZ2A
IDI1
DIAPH1
CD52
EIF2A
JARID2
FGFR1OP2
PPM1L
TIMM8B
TMCO1
COMMD3
ATP6V1G1
TXNDC9
SIGLEC10
C21orf91
ZNF273
CD48
TMX1
ANKRD12
PTAFR
CSNK1G3
LPAR6
MRPL21
GXYLT1
IER3IP1
RPL41
DLD
LSM1
ZMIZ1
NDUFS5
ZNHIT3
ZNF654
SAMD9
ARID4B
CD69
IFT20
REXO2
ERN1
CEP57
NUDCD1
SUCLA2
STXBP3
VRK1
TCEAL1
BET1
CCDC88A
GPR15
TRAPPC6B
SLFN12
SAMSN1
ATF1
FN1
ATP8B4
TMOD2
ZNF354A
DPY19L2P2
ZFAND6
WEE1
RFK
LGALS2
PARP15
HS3ST3B1
UBL5
PMAIP1
CLIP4
MRPS21
CDKN2C
C9orf40
CENPK
TPR
RALBP1
PARD6B
MEF2C
IQGAP2
NDUFB1
RGMB
ATAD2B
SPICE1
HDAC9
ZXDA
PLA2G4A
RPL22
SLC36A4
HPGD
TRERF1
CPNE8
IKZF2
ACADSB
PLCL1
GADD45GIP1
ABHD3
IL6ST
MSH2
RNASET2
GSTO1
PPP2R3C
ELL2
ASB7
ZNF266
GCNT1
ZNF600
RHOT1
TLR1
ST8SIA4
GMFG
NFIL3
GCA
ZNF350
UBE2W
FAM126B
TFEC
KIN
LXN
SCRN1
ZNF254
SNX13
XRCC4
CYB5R4
C1GALT1C1
JAK2
CD93
BTBD10
MAP2K4
TSPAN2
BCL2A1
SPAST
HMGCR
SLC12A7
RB1CC1
C9orf72
SSBP3
MDM2
RNF146
CEACAM21
CCPG1
PRPF8
SKI
D2HGDH
SCLT1
ZFYVE16
NAB1
NFXL1
RAB18
HSDL2
VNN2
CCDC126
ZNF440
RLF
NBN
VCPIP1
RNF141
TBK1
CHMP5
MINK1
FAS
LMBRD1
CLEC2B
MGAT5
SOS2
SPOPL
RNASE2
EHMT2
STK38L
RASA4
CHUK
IPMK
RP2
IFRD1
ZNF267
OSGIN2
TOPORS
UBE2D1
UHRF1BP1L
ZNF701
GPR65
RMI1
KRT73
LY75
ZNF844
FAR1
CTBS
BAZ1A
PTPRO
ARID4A
IFNGR1
HIPK2
CHERP
RRM2B
ATP6V1D
TDP2
EXOC6
KCNJ2
PFKP
CUBN
CAPNS2
LRRN1
ELANE
SERPINB9
PPP1R3D
ORM1
TM6SF1
SLC22A16
NQO2
HP
CASP5
CD177
HAUS4
PTGS2
OSM
STK3
IL18
DPY19L3
HCG27
VEGFA
SLC31A2
DOCK4
PI3
ICAM2
ERAP2
FAM153B
MMP8
GADD45A
OLFM4
DMXL2
CXCR3
TIAM2
DCBLD1
BHLHE40
PHTF1
PRDM5
GTF2I
CD8B
CLEC5A
PTRH2
MARCO
AIG1
CLEC12B
FUT7
LONRF1
IL18R1
BPI
TMTC1
HORMAD1
HSBP1
IFI27L2
EPHB4
ACSL4
FOLR3
SAT1
TMEM63A
B3GNT5
MPZL2
ATXN7L1
ZBTB34
IRF2BP2
ZNF230
CHSY1
DEFA4
PROK2
CEACAM8
AMN1
FLYWCH1
ABCA1
SND1
IGFBP7
ITGA1
PRRG4
DSC2
MS4A6A
THBD
MAP2K6
NCR3
MPO
SAMD8
LPCAT2
TLR8
LIN7A
ADAM9
STX11
BEND7
ARG1
SLPI
TULP4
CAMP
TRIB1
CIR1
CXXC5
CRISP3
ADA
LSS
BLOC1S1
LETM2
GRB10
SCFD2
CD59
SLC36A1
IL12RB2
GPR27
RNASE3
CKLF
VNN1
CAD
SAP30
HTATIP2
ANKRD50
LTF
TGFA
CLEC12A
TLR4
ZNF93
KIAA0319
CLEC4A
LCN2
LPAR1
NRG1
TXNDC17
SCML4
SEMA3C
KRT23
ZNF200
VSTM1
